# Supplementary material for: A trustworthy mechanochemical route to isocyanides
Source: publisher site journal article supplement (doi:10.3762/bjoc.18.73), 2022-06-22

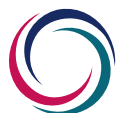

## Supporting Information

for

### A trustworthy mechanochemical route to isocyanides

Francesco Basoccu, Federico Cuccu, Federico Casti, Rita Mocci, Claudia Fattuoni  
and Andrea Porcheddu

*Beilstein J. Org. Chem.* **2022**, *18*, 732–737. doi:10.3762/bjoc.18.73

## Experimental

## Table of contents

|                                                         |     |
|---------------------------------------------------------|-----|
| 1. General information .....                            | S2  |
| 2. Mechanochemical synthesis of <b>2a–i</b> .....       | S3  |
| 3. Procedure for the optimization of the reaction ..... | S7  |
| 4. Green chemistry metrics calculations .....           | S8  |
| 5. References .....                                     | S12 |
| 6. NMR spectra .....                                    | S13 |

## 1. General information

Commercially available reagents were purchased from Acros, Aldrich, Strem Chemicals, Alfa-Aesar, TCI Europe and used as received. All reactions were monitored by thin-layer chromatography (TLC) performed on glass-backed silica gel 60 F254, 0.2 mm plates (Merck), and compounds were visualized under UV light (254 nm) or using cerium ammonium molybdate solution with subsequent heating. The eluents were technical grade. Mechanochemical reactions were carried out using a FormTech FTS-1000 Shaker Mill® apparatus. The reagents were milled using a zirconia SmartSnap™ grinding jar (15 mL) equipped with balls ( $\varnothing = 8$  mm) of the same material. Precisely, the zirconium oxide of the vessels and balls used for all reactions accomplished in the mixer mill is yttrium oxide stabilized (ZrO<sub>2</sub>-Y). These parameters were applied if not stated otherwise. <sup>1</sup>H and <sup>13</sup>C liquid NMR spectra were recorded on a Varian 500 MHz and Bruker Avance III HD 600 MHz NMR spectrometer at 298 K and were calibrated using trimethylsilane (TMS). Proton chemical shifts are expressed in parts per million (ppm,  $\delta$  scale) and are referred to the residual hydrogen in the solvent (CHCl<sub>3</sub>, 7.27 ppm or DMSO 2.54 ppm). Data are represented as follows: chemical shift, multiplicity (s = singlet, d = doublet, t = triplet, q = quartet, m = multiplet and/or multiple resonances, br s = broad singlet, and combination of thereof), coupling constant (J) in hertz (Hz) and integration. Carbon chemical shifts are expressed in parts per million (ppm,  $\delta$  scale) and are referenced to the carbon resonances of the NMR solvent (CDCl<sub>3</sub>,  $\delta$  77.0 ppm or  $\delta$  DMSO-*d*<sub>6</sub>  $\delta$  39.5 ppm). Deuterated NMR solvents were obtained from Aldrich. Samples were analyzed using an Agilent 5977B MS interfaced to the GC 7890B equipped with a DB-5ms column (J & W), injector temperature at 230 °C, detector temperature at 280 °C, helium carrier gas flow rate of 1 ml/min. The GC oven temperature program was 60 °C initial temperature with 4 min hold time and ramping at 15 °C/min to a final temperature of 270 °C with 7 min hold time. One  $\mu$ L of each sample was injected in split (1:20) mode. After a solvent delay of 3 min mass spectra were acquired in full scan mode using 2.28 scans/s with a mass range of 50–500 Amu. Retention times of different compounds were determined by injecting pure compounds under identical conditions. All the experiments were carried out in duplicate to ensure reproducibility of the experimental data. Yields refer to pure isolated materials.

## 2. Mechanochemical synthesis of isocyanides 2a–i

### General procedure for isocyanide synthesis

A 15 mL ZrO<sub>2</sub> jar equipped with two ZrO<sub>2</sub> milling balls (8.0 mm in diameter) was filled with formamide **1a–i** (1.0 mmol), *p*-tosyl chloride (1.5 mmol), triethylamine (1.0 mmol), and Na<sub>2</sub>CO<sub>3</sub> (6.0 mmol). The vessel was then closed and the mechanochemical reaction was conducted for 60 min at a frequency of 18 Hz. At the end of the reaction, additional 15 min grinding with H<sub>2</sub>O (0.5 equiv) was performed. After this step, the crude was recovered as a solid in a beaker and dissolved in heptane (10 mL). A short silica pad (1.0 g) was required for a further purification. Lastly, the organic layer was dried over Na<sub>2</sub>SO<sub>4</sub>, and the solvent was removed under reduced pressure to afford the pure isocyanide compound.

### General procedure for isocyanide gram scale synthesis

A 15 mL ZrO<sub>2</sub> jar equipped with three ZrO<sub>2</sub> milling balls (10 mm in diameter) was filled with formamide **1a–i** (5.0 mmol), *p*-tosyl chloride (7.5 mmol), triethylamine (5.0 mmol), and Na<sub>2</sub>CO<sub>3</sub> (30 mmol). The vessel was then closed and the mechanochemical reaction was conducted for 60 min at a frequency of 18 Hz. At the end of the reaction, additional 15 min grinding with H<sub>2</sub>O (0.5 equiv) was performed. After this step, the crude was recovered as a solid in a beaker and dissolved in heptane (50 mL). A short silica pad (5.0 g) was required for a further purification. Lastly, the organic layer was dried over Na<sub>2</sub>SO<sub>4</sub>, and the solvent was removed under reduced pressure to afford the pure isocyanide compound.

### Isocyanobenzene (**2a**)

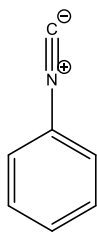

The title compound was synthesized according to the general procedure stated above. **1a** (121.1 mg, 1.0 mmol), *p*-tosyl chloride (285.9 mg, 1.5 mmol), triethylamine (139  $\mu$ l, 1.0 mmol), and Na<sub>2</sub>CO<sub>3</sub> (635.9 mg, 6.0 mmol) were used, to afford **2a** after a short silica pad (SiO<sub>2</sub>/*n*-heptane 100% v/v) as a yellowish oil (72.2 mg, 0.7 mmol, 70%).

R<sub>f</sub> = 0.60 (*n*-heptane:EtOAc 9:1 v/v)

<sup>1</sup>H NMR (600 MHz, CDCl<sub>3</sub>):  $\delta$  = 7.40-7.36 (m, 5H)

<sup>13</sup>C NMR (151 MHz, CDCl<sub>3</sub>):  $\delta$  = 164.1, 129.6, 129.5, 126.6.

The spectroscopic data closely match the ones previously reported in the literature.<sup>1</sup>

### 1-Fluoro-4-isocyanobenzene (**2b**)

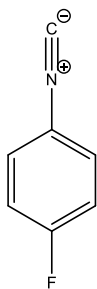

The title compound was synthesized according to the general procedure stated above. **1b** (139.1 mg, 1 mmol), *p*-tosyl chloride (285.9 mg, 1.5 mmol), triethylamine (139  $\mu$ l, 1 mmol), and Na<sub>2</sub>CO<sub>3</sub> (635.9 mg, 6 mmol) were used, to afford **2b** after a short silica pad (SiO<sub>2</sub>/*n*-heptane 100% v/v) as a brownish solid (81.1 mg, 0.67 mmol, 67%).

R<sub>f</sub> = 0.64 (*n*-heptane:EtOAc 9:1 v/v)

<sup>1</sup>H NMR (600 MHz, CDCl<sub>3</sub>):  $\delta$  = 7.38-7.36 (d, *J* = 8.5 Hz, 2H), 7.32-7.31 (d, *J* = 8.4 Hz, 2H).

<sup>13</sup>C NMR (151 MHz, CDCl<sub>3</sub>):  $\delta$  = 165.8, 135.5, 129.9, 127.8, 125.3, 125.2, 125.1.

The spectroscopic data closely match the ones previously reported in the literature.<sup>2</sup>

### 1-Bromo-4-isocyanobenzene (**2c**)

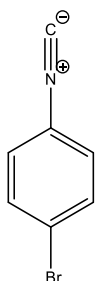

The title compound was synthesized according to the general procedure stated above. **1c** (200.0 mg, 1.0 mmol), *p*-tosyl chloride (285.9 mg, 1.5 mmol), triethylamine (139  $\mu$ l, 1.0 mmol), and Na<sub>2</sub>CO<sub>3</sub> (635.9 mg, 6.0 mmol) were used, to afford **2c** after a short silica pad (SiO<sub>2</sub>/*n*-heptane 100% v/v) as a yellowish solid (131.0 mg, 0.72 mmol, 72%).

R<sub>f</sub> = 0.61 (*n*-heptane:EtOAc 9:1 v/v)

<sup>1</sup>H NMR (600 MHz, CDCl<sub>3</sub>):  $\delta$  = 7.55 – 7.53 (m, 2H), 7.26-7.25 (d, *J* = 2.1 Hz, 2H).

<sup>13</sup>C NMR (151 MHz, CDCl<sub>3</sub>):  $\delta$  = 132.9, 128.0, 123.6.

The spectroscopic data closely match the ones previously reported in the literature.<sup>3</sup>

### 1-Isocyano-3-methylbenzene (**2d**)

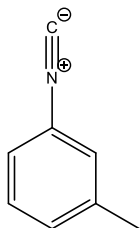

The title compound was synthesized according to the general procedure stated above. **1d** (135.2 mg, 1 mmol), *p*-tosyl chloride (285.9 mg, 1.5 mmol), triethylamine (139 mg, 1 mmol), and Na<sub>2</sub>CO<sub>3</sub> (635.9 mg, 6 mmol) were used, to afford **2d** after a short silica pad (SiO<sub>2</sub>/n-heptane 100% v/v) as a brown oil (83.2 mg, 0.71 mmol, 71%).

*R*<sub>f</sub> = 0.57 (*n*-heptane:EtOAc 9:1 v/v)

<sup>1</sup>H NMR (600 MHz, CDCl<sub>3</sub>): δ = 7.27 – 7.25 (m, 1H), 7.21 – 7.17 (m, 3H), 2.36 (s, 3H).

<sup>13</sup>C NMR (151 MHz, CDCl<sub>3</sub>): δ = 163.7, 139.8, 130.3, 129.3, 127.0, 123.6, 21.2.

### 1-isocyano-4-methoxybenzene **2e**

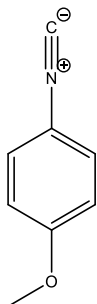

The title compound was synthesized according to the general procedure stated above. **1e** (151.2 mg, 1.0 mmol), *p*-tosyl chloride (285.9 mg, 1.5 mmol), triethylamine (139 μl, 1.0 mmol), and Na<sub>2</sub>CO<sub>3</sub> (635.9 mg, 6.0 mmol) were used, to afford **2e** after a short silica pad (SiO<sub>2</sub>/n-heptane 100% v/v) as a yellow solid (109.2 mg, 0.82 mmol, 82%).

*R*<sub>f</sub> = 0.45 (*n*-hexane:EtOAc 9:1 v/v)

<sup>1</sup>H NMR (600 MHz, CDCl<sub>3</sub>): δ = 7.31 (d, 2H), 6.93 – 6.83 (m, 2H), 3.82 (s, 3H).

<sup>13</sup>C NMR (151 MHz, CDCl<sub>3</sub>): δ = 160.0, 127.9, 114.7, 55.7.

The spectroscopic data closely match the ones previously reported in the literature.<sup>1</sup>

### Benzyl isocyanide (**2f**)

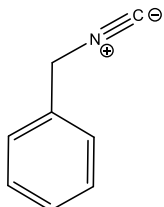

The title compound was synthesized according to the general procedure stated above. **1f** (135.2 mg, 1.0 mmol), *p*-tosyl chloride (285.9 mg, 1.5 mmol), triethylamine (139 μl, 1.0 mmol), and Na<sub>2</sub>CO<sub>3</sub> (635.9 mg, 6.0 mmol) were used, to afford **2f** after a short silica pad (SiO<sub>2</sub>/n-heptane 100% v/v) as a brown oil (110.2 mg, 0.94 mmol, 94%).

*R*<sub>f</sub> = 0.55 (*n*-heptane:EtOAc 9:1 v/v)

<sup>1</sup>H NMR (600 MHz, CDCl<sub>3</sub>): δ = 7.44 – 7.38 (m, 2H), 7.38 – 7.32 (m, 3H), 4.65 (t, *J* = 2.3 Hz, 2H).

<sup>13</sup>C NMR (151 MHz, CDCl<sub>3</sub>): δ = 157.8, 132.35, 129.00, 128.44, 126.62, 45.6.

The spectroscopic data closely match the ones previously reported in the literature.<sup>1</sup>

### 1-Isocyanooctane (**2g**)

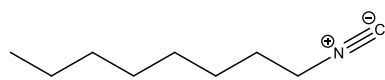

The title compound was synthesized according to the general procedure stated above. **1g** (157.3 mg, 1.0 mmol), *p*-tosyl chloride (285.9 mg, 1.5 mmol), triethylamine (139  $\mu$ l, 1.0 mmol), and  $\text{Na}_2\text{CO}_3$  (635.9 mg, 6.0 mmol) were used, to afford **2g** after a short silica pad ( $\text{SiO}_2$ /*n*-heptane 100% v/v) as a colourless oil (125.3 mg, 0.9 mmol, 90%)

$R_f$  = 0.53 (*n*-heptane:EtOAc 9:1 v/v)

$^1\text{H}$  NMR (600 MHz,  $\text{CDCl}_3$ ):  $\delta$  = 3.37 (ddt, 2H), 1.67 (dddd, 2H), 1.43 (td, 2H), 1.35 – 1.21 (m, 8H), 0.89 (t, 3H).

$^{13}\text{C}$  NMR (151 MHz,  $\text{CDCl}_3$ ):  $\delta$  = 155.7, 41.8, 41.7, 41.6, 31.8, 29.3, 29.2, 28.8, 26.5, 22.7, 14.2.

The spectroscopic data closely match the ones previously reported in the literature.<sup>1</sup>

### 2-Isocyanooheptane (**2h**)

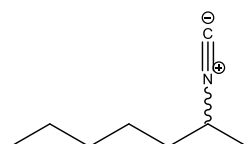

The title compound was synthesized according to the general procedure stated above. **1h** (143.1 mg, 1.0 mmol), *p*-tosyl chloride (285.9 mg, 1.5 mmol), triethylamine (139  $\mu$ l, 1.0 mmol), and  $\text{Na}_2\text{CO}_3$  (635.9 mg, 6.0 mmol) were used, to afford **2h** after a short silica pad ( $\text{SiO}_2$ /*n*-heptane 100% v/v) as a yellow oil (107,6 mg, 0.86 mmol, 86%).

$R_f$  = 0.50 (*n*-heptane:EtOAc 9:1 v/v)

$^1\text{H}$  NMR (600 MHz,  $\text{CDCl}_3$ ):  $\delta$  = 3.62-3.58 (m, 1H), 1.70-1.69 (m, 2H), 1.36-1.34 (m, 6H), 0.91-0.88 (m, 6H).

$^{13}\text{C}$  NMR (151 MHz,  $\text{CDCl}_3$ ):  $\delta$  = 154.2, 50.4, 36.9, 31.3, 25.5, 22.6, 21.8, 14.1.

### Isocyanocyclohexane (**2i**)

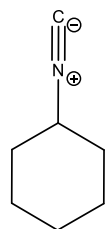

The title compound was synthesized according to the general procedure stated above. **1i** (127.2 mg, 1.0 mmol), *p*-tosyl chloride (285.9 mg, 1.5 mmol), triethylamine (139  $\mu$ l, 1.0 mmol), and  $\text{Na}_2\text{CO}_3$  (635.9 mg, 6.0 mmol) were used, to afford **2i** after a short silica pad ( $\text{SiO}_2$ /*n*-heptane 100% v/v) as a yellowish oil (96.1 mg, 0.88 mmol, 88%).

$R_f$  = 0.60 (*n*-heptane:EtOAc 9:1 v/v)

$^1\text{H}$  NMR (600 MHz,  $\text{CDCl}_3$ ):  $\delta$  = 3.61-3.58 (tt,  $J$  = 8.2, 3.4 Hz, 1H), 1.90 – 1.86 (m, 2H), 1.77 – 1.64 (m, 4H), 1.49-1.34 (m, 4H).

$^{13}\text{C}$  NMR (151 MHz,  $\text{CDCl}_3$ ):  $\delta$  = 154.1, 52.0, 51.9, 51.8, 32.8, 25.1, 22.9.

The spectroscopic data closely match the ones previously reported in the literature.<sup>1</sup>

### 3. Procedure for the optimization of the reaction (Table S1)

A 15 mL ZrO<sub>2</sub> jar equipped with two ZrO<sub>2</sub>-Y milling ball (8.0 mm diameter) was filled with formamide **1f** (1.0 mmol), dehydrating combo reagents. The vessel was then closed and the mechanochemical reaction was conducted at different times in a different range of frequency (from 18 to 36 Hz). At the end of the reaction, the crude was recovered as a solid in a beaker, dissolved in hexane (15 mL). A silica pad (2.0 g) was required for purification. Lastly, the organic layer was dried over Na<sub>2</sub>SO<sub>4</sub>, and the solvent was removed under reduced pressure to afford the pure isocyanide compound.

**Table S1.** Optimization of the reaction conditions for isocyanide **2f** synthesis in the presence of different dehydrating agents.

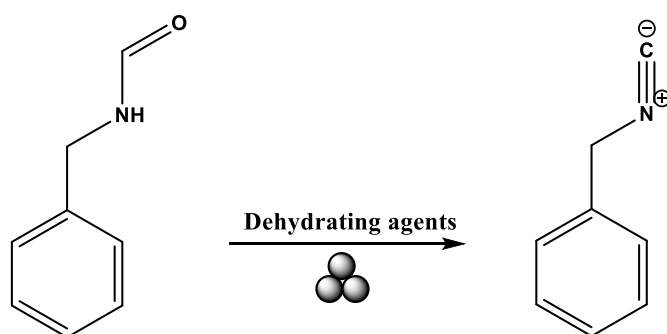

| Entry | Dehydrating agents | Additive                                                                    | Yield (%) <sup>g</sup> |
|-------|--------------------|-----------------------------------------------------------------------------|------------------------|
| 1     | Ac <sub>2</sub> O  | Triethylamine <sup>a</sup>                                                  | 60%                    |
| 2     | TFAA               | Triethylamine <sup>a</sup>                                                  | 67%                    |
| 3     | Isatoic Anhydride  | Triethylamine <sup>a</sup>                                                  | < 1%                   |
| 4     | CDI                | NaHSO <sub>4</sub>                                                          | traces                 |
| 5     | DIC                | Triethylamine <sup>a</sup>                                                  | 18%                    |
| 6     | p-Ts imidazole     | NaHSO <sub>4</sub>                                                          | traces                 |
| 7     | p-Ts imidazole     | NaHSO <sub>4</sub> <sup>a</sup>                                             | traces                 |
| 8     | <b>p-TsCl</b>      | <b>Triethylamine<sup>d,e</sup></b>                                          | <b>quant.</b>          |
| 9     | p-TsCl             | N-methyl imidazole                                                          | 43%                    |
| 10    | p-TsCl             | N-methyl imidazole <sup>b,c,e</sup>                                         | 75%                    |
| 11    | p-TsCl             | Imidazole <sup>b,c</sup>                                                    | 20%                    |
| 12    | p-TsCl             | Na <sub>2</sub> CO <sub>3</sub> anhydrous + triethylamine                   | 70%                    |
| 13    | <b>p-TsCl</b>      | <b>Na<sub>2</sub>CO<sub>3</sub> anhydrous + Triethylamine<sup>e,f</sup></b> | <b>94%</b>             |
| 14    | p-TsCl             | Na <sub>2</sub> CO <sub>3</sub> anhydrous                                   | 2%                     |
| 15    | p-TsCl             | Na <sub>2</sub> CO <sub>3</sub>                                             | < 1%                   |
| 16    | p-TsCl             | K <sub>2</sub> CO <sub>3</sub>                                              | traces                 |
| 17    | p-TsCl             | Cs <sub>2</sub> CO <sub>3</sub>                                             | traces                 |
| 18    | p-TsCl             | MgO                                                                         | traces                 |
| 19    | p-TsCl             | BaO                                                                         | traces                 |
| 20    | p-TsCl             | LiCl                                                                        | traces                 |
| 21    | p-TsCl             | BF <sub>3</sub> ·Et <sub>2</sub> O                                          | Traces                 |

Reaction conditions: formamide **1f** (1 mmol), dehydrating agents (1 mmol), additive (10 mol%), 60 min, 36 Hz. <sup>a</sup> Additive (1 mmol). <sup>b</sup> Additive (2 mmol). <sup>c</sup> 120 min reaction. <sup>d</sup> additive (7 mmol), NaCl (400 mg), 0.5 h, 36 Hz. <sup>e</sup> Frequency of 18 Hz. <sup>f</sup> Na<sub>2</sub>CO<sub>3</sub> (6 mmol), triethylamine (1 mmol). <sup>g</sup> GC-MS calculated yields.



## 4. Green chemistry metrics calculations

Calculation of the Green Chemistry metrics for the mechanochemical preparation of **1f**

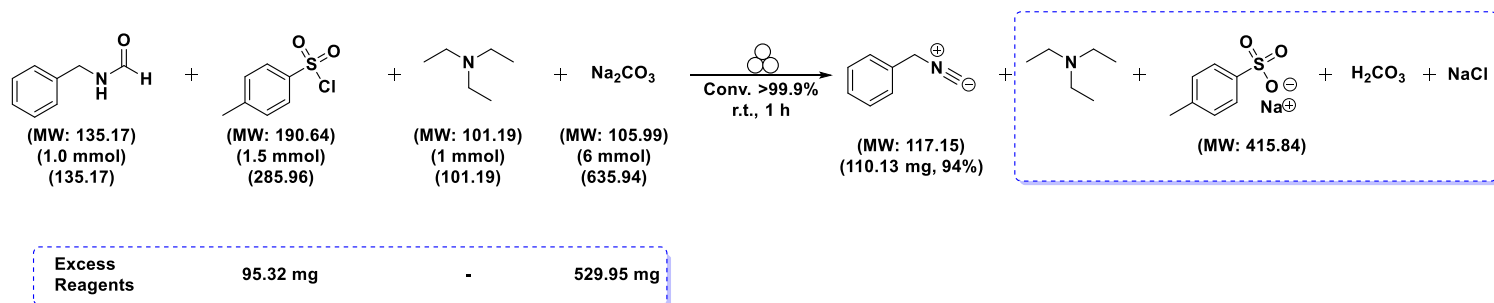

**Scheme S1.** Mechanochemical preparation of Isocyanide **1f**.

### Calculation of Green Chemistry Metrics

$$\text{Atom Economy} = \frac{\text{Mass of desired useful product}}{\text{Total Mass of all reactants}} \times 100 = \frac{117,15}{532,99} \times 100 = 22\%$$

$$\text{Environmental Factor} = \frac{\text{Mass of total waste}}{\text{Mass of desired product}} = \frac{194,18 + 95,32 + 58,44 + 101,19 + 529,95 + 62,03}{110,13} = 9,5$$

$$\text{Reaction Mass Efficiency} = \frac{\text{actual mass of desired product}}{\text{mass of reactants}} \times 100 = \frac{110,1}{135,2 + 286,0 + 101,2 + 635,9} \times 100 = 9,5\%$$

**The eco-scale score for the mechanochemical preparation of isocyanide 1f**

**EcoScale:** 100 – sum of penalty points

**Table S2.** Calculation of Ecoscale score<sup>a</sup>

| Reagents                           | MF        | MW     | G      | mmol | Equiv. |
|------------------------------------|-----------|--------|--------|------|--------|
| N-Benzylformamide                  | C8H9NO    | 135.16 | 0.1352 | 1    | 1      |
| <i>p</i> -Toluenesulfonyl chloride | C7H7ClO2S | 190.64 | 0.2860 | 1.5  | 1.5    |
| Triethylamine                      | C6H15N    | 101.19 | 0.1012 | 1    | 1      |
| Sodium carbonate                   | CNa2O3    | 105.99 | 0.6360 | 6    | 6      |
| Product                            | MF        | MW     | G      | mmol | Yield  |
| Benzyl isocyanide                  | C8H7N     | 117.15 | 0.1102 | 0.94 | 94%    |

| Entry | Parameters                       | Penalty Points |
|-------|----------------------------------|----------------|
| 1     | Yield (94%)                      | -3             |
| 2     | Price/availability               | -5             |
| 3     | Safety                           | -10            |
| 4     | Technical set-up (Common set-up) | 0              |
| 5     | Temperature/time (r.t.; < 24 h)  | -1             |
| 6     | Work-up and purification         | 0              |
|       | <b>EcoScale Score</b>            | <b>81</b>      |

<sup>a</sup>Values calculated using the eco scale calculator software available at the link:

<http://ecoscale.cheminfo.org/calculator>

### Calculation of the Green Chemistry metrics for the in-solution preparation of **1f**

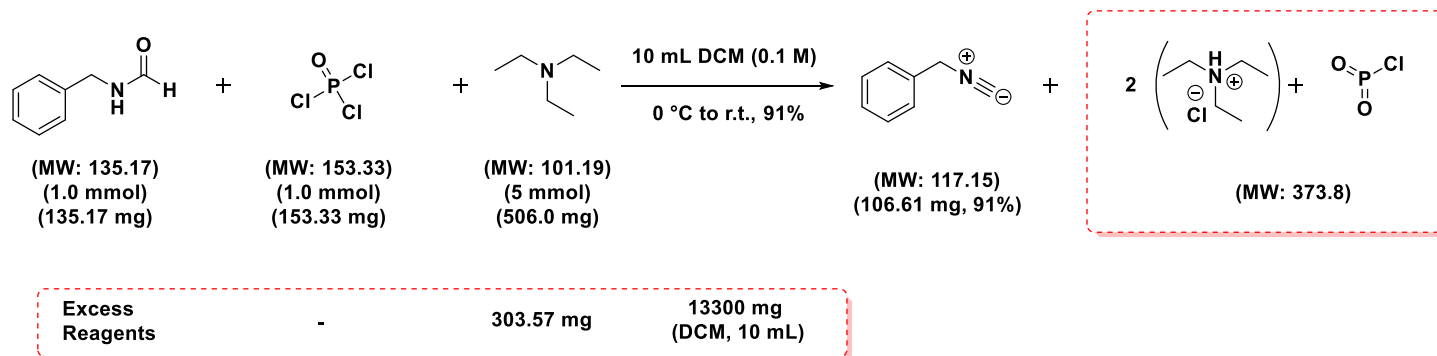

**Scheme S2.** In-solution\* preparation of Isocyanide **1f**.

\*Patil, P., Moghaddam, M. A., Dömling, A., *Green Chem.* **2020.** 22, 6902-6911.

### Calculation of green chemistry metrics

$$\text{Atom Economy} = \frac{\text{Mass of desired useful product}}{\text{Total Mass of all reactants}} \times 100 = \frac{117,15}{389,68} \times 100 = 30\%$$

$$\text{Environmental Factor} = \frac{\text{Mass of total waste}}{\text{Mass of desired product}} = \frac{303,6 + 13300,0 + 373,8}{106,6} = 131.1$$

$$\text{Reaction Mass Efficiency} = \frac{\text{actual mass of desired product}}{\text{mass of reactants}} \times 100$$

$$\text{RMS} = \frac{106,61}{135,16+505,96+153,33} \times 100 = 13,42\%$$

**The eco-scale score for the in-solution preparation of isocyanide 1f**

**EcoScale:** 100 – sum of penalty points

**Table S3.** Calculation of Ecoscale score<sup>a</sup>

| Reagents               | MF     | MW     | G       | mmol | Equiv. |
|------------------------|--------|--------|---------|------|--------|
| N-Benzylformamide      | C8H9NO | 135.16 | 0.1352  | 1    | 1      |
| Phosphorus oxychloride | Cl3OP  | 153.33 | 0.15333 | 1    | 1      |
| Triethylamine          | C6H15N | 101.19 | 0.5060  | 5    | 5      |
| Product                | MF     | MW     | G       | mmol | Yield  |
| Benzyl isocyanide      | C8H7N  | 117.15 | 0.1066  | 0.91 | 91%    |

| Entry | Parameters                                             | Penalty Points |
|-------|--------------------------------------------------------|----------------|
| 1     | Yield (91%)                                            | -4             |
| 2     | Price/availability                                     | -5             |
| 3     | Safety                                                 | -20            |
| 4     | Technical set-up (Unconventional activation technique) | -2             |
| 5     | Temperature/time (Cooling to 0 °C)                     | -4             |
| 6     | Work-up and purification (Classical chromatography)    | -10            |
|       | <b>EcoScale Score</b>                                  | <b>55</b>      |

<sup>a</sup>Values calculated using the eco scale calculator software available at the link:

<http://ecoscale.cheminfo.org/calculator>

## 5. References

- <sup>1</sup> Mocci, R.; Murgia, S.; De Luca, L.; Colacino, E.; Delogu, F.; Porcheddu, A. *Org. Chem. Front.* **2018**, *5*, 531–538. doi:10.1039/c7qo01006k
- <sup>2</sup> Boeyens, J. C. A., Cook, L. M., Ding, Y., Fernandez, M. A., Reid, D.H., *Org. Biomol. Chem.*, **2003**, *1*, 2168-2172.
- <sup>3</sup> <https://scifinder-n.cas.org/searchDetail/substance/623ef9727c008e5975793f8b/substanceSpectra>.
- <sup>4</sup> Kalinski, C., Umkehrer, M., Gonnard, S., Jäger, N., Ross, G., Hiller, W., *Tetrahedron Letters*, **2006**, *47*, 2041-2044.

## 6. Copies of spectra

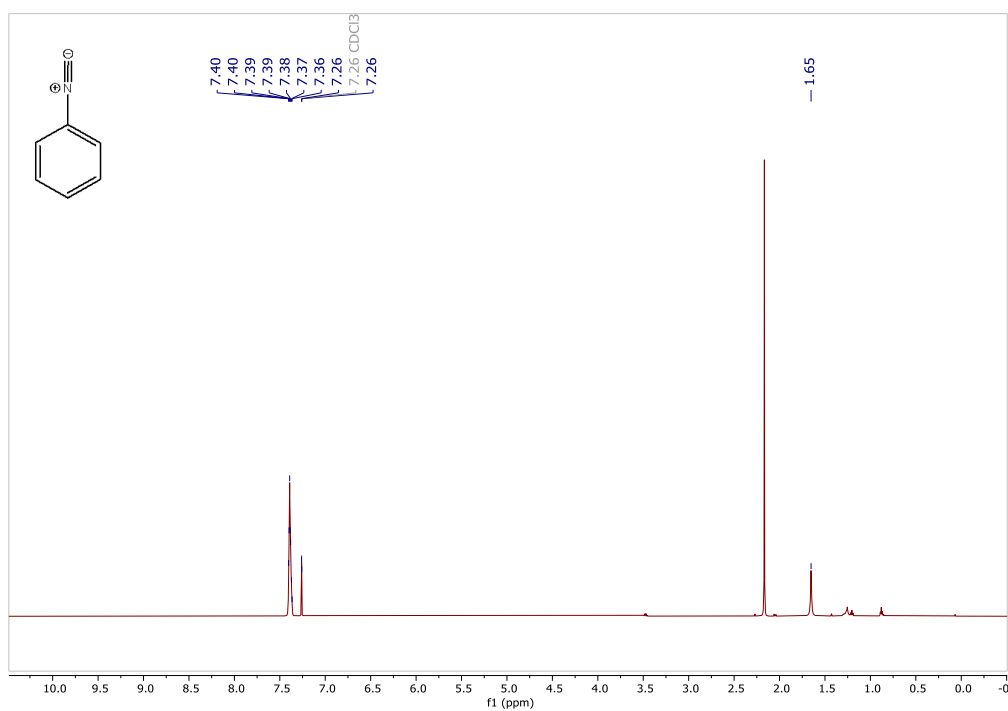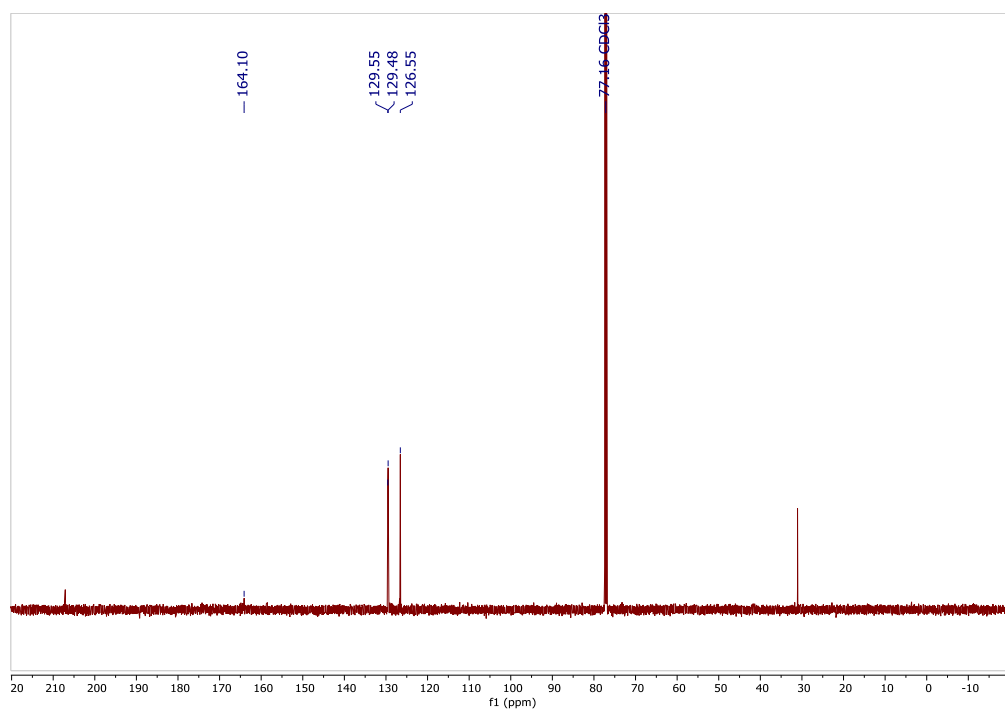

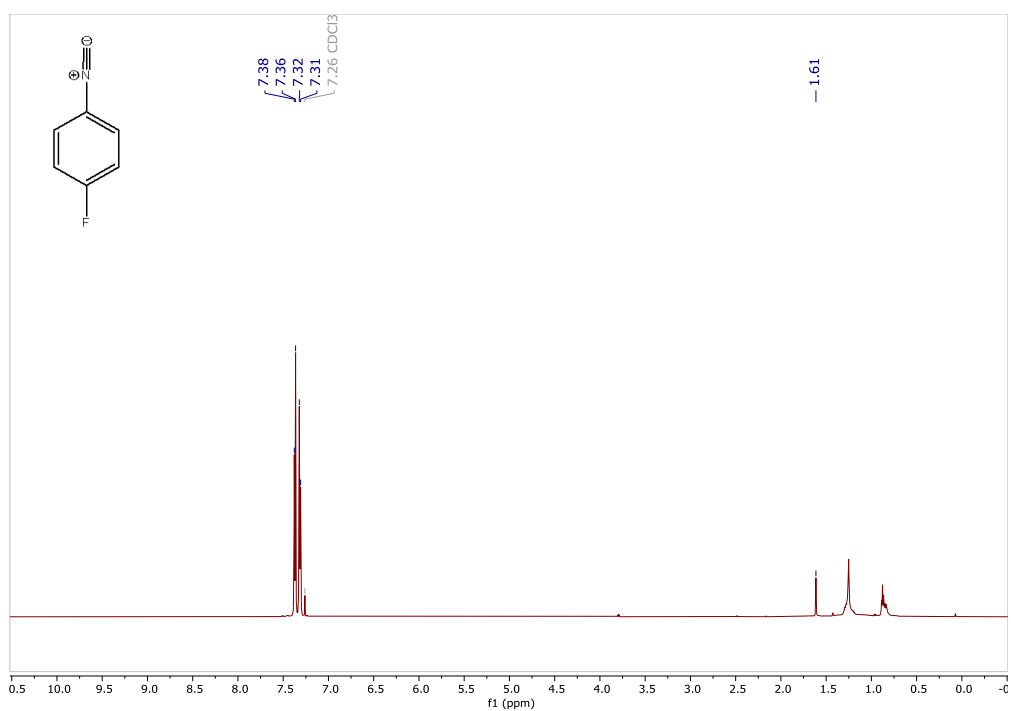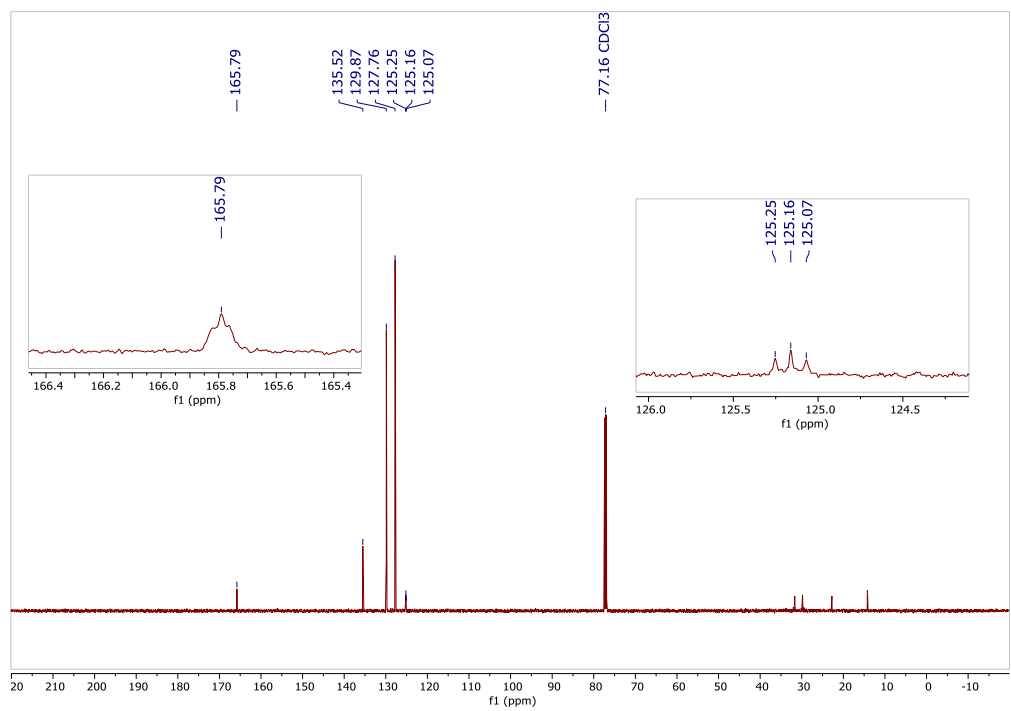

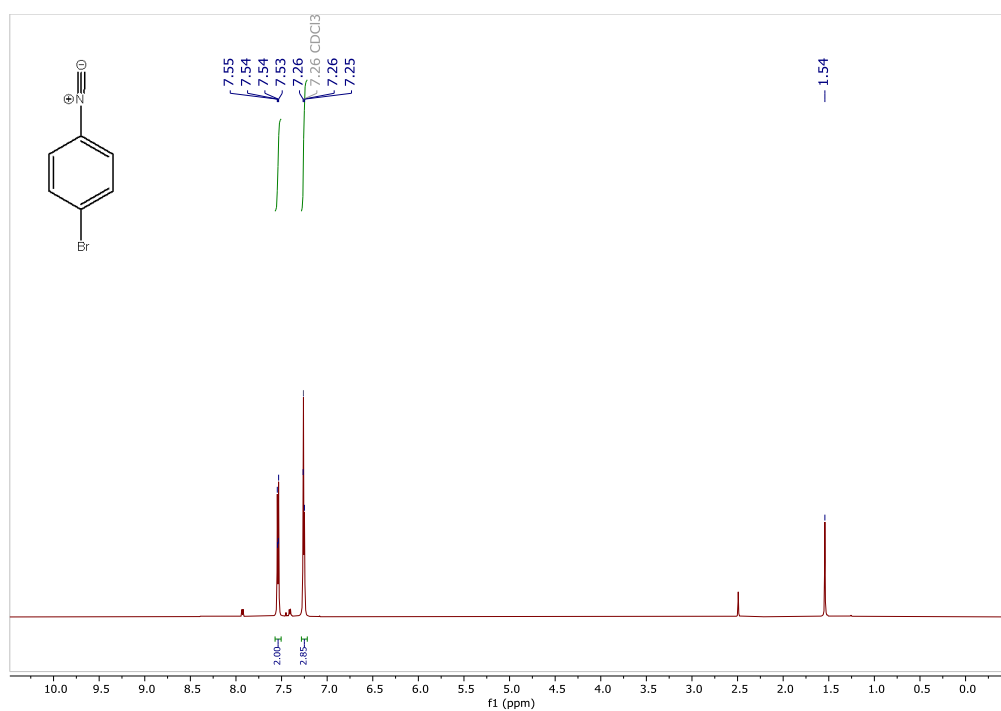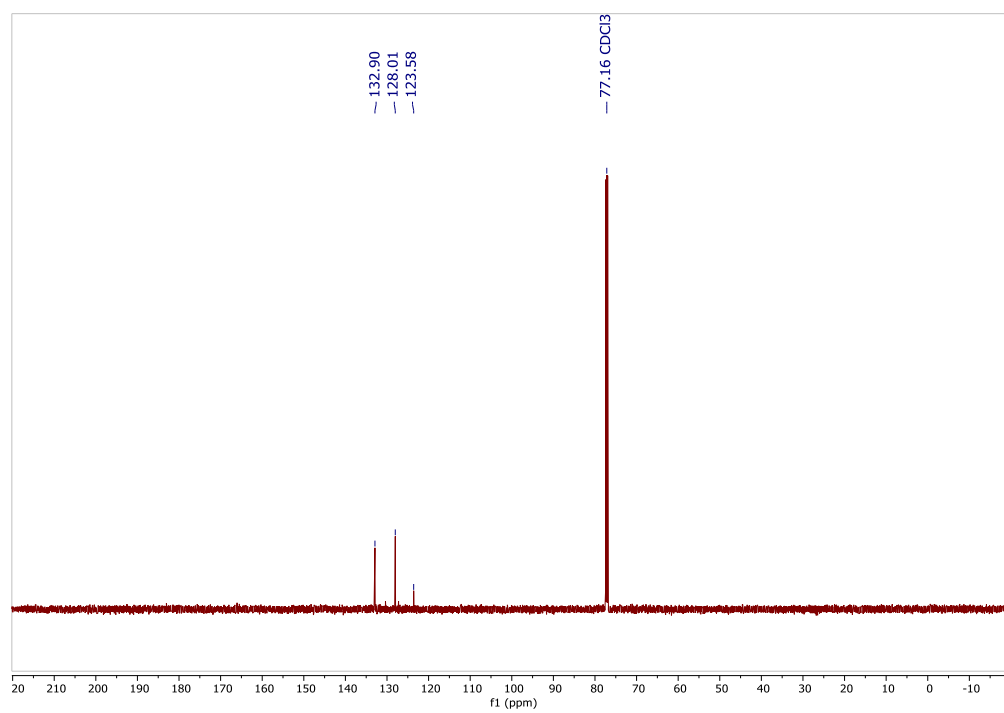



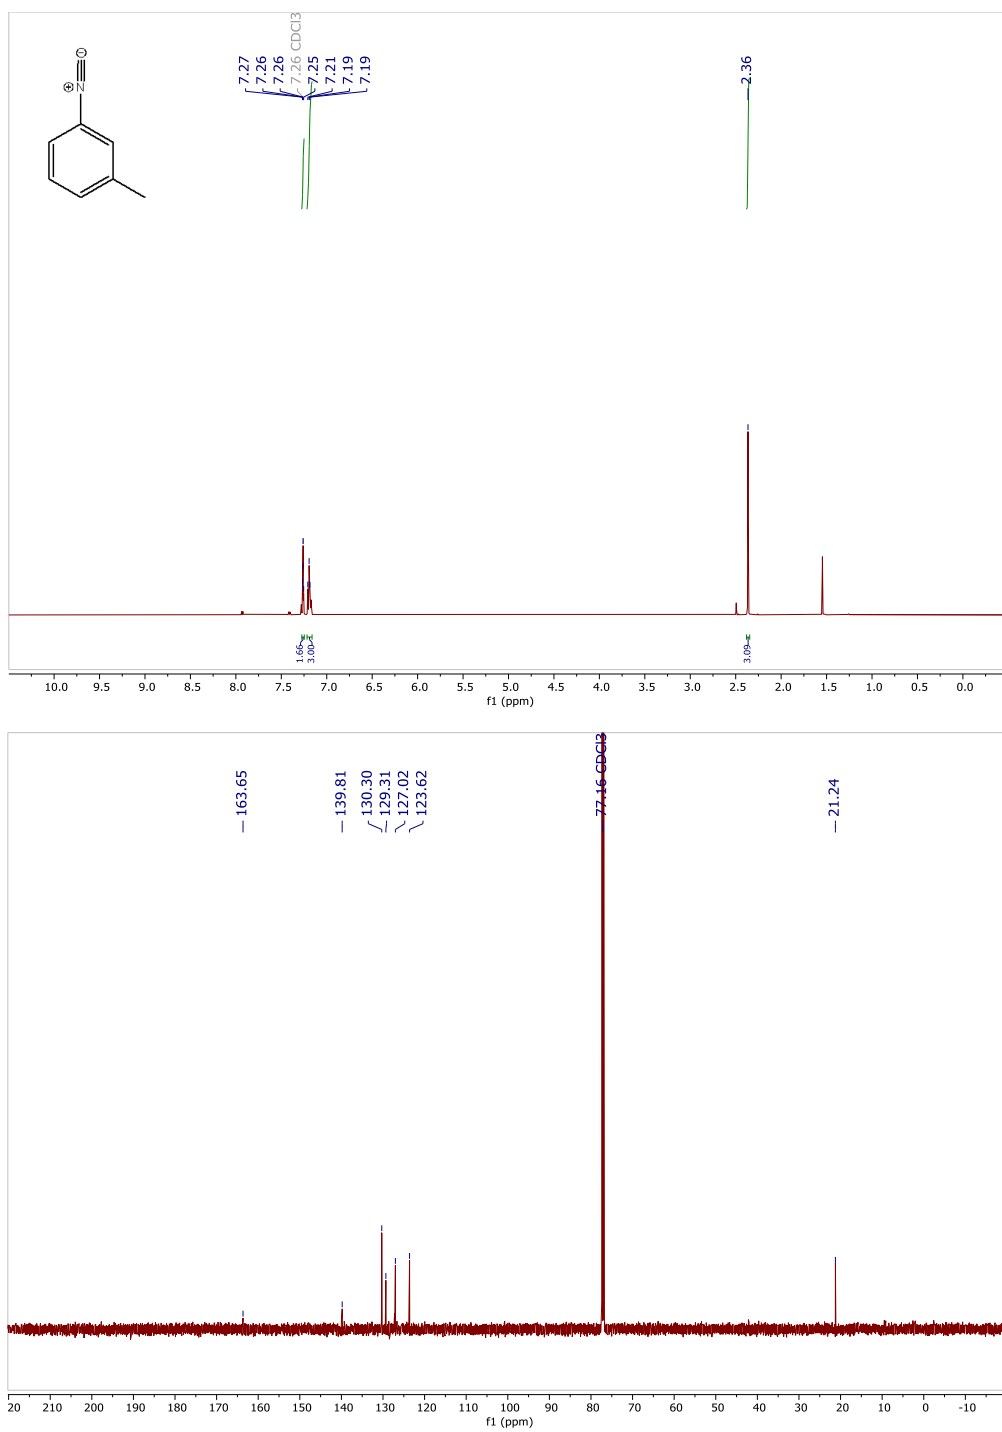

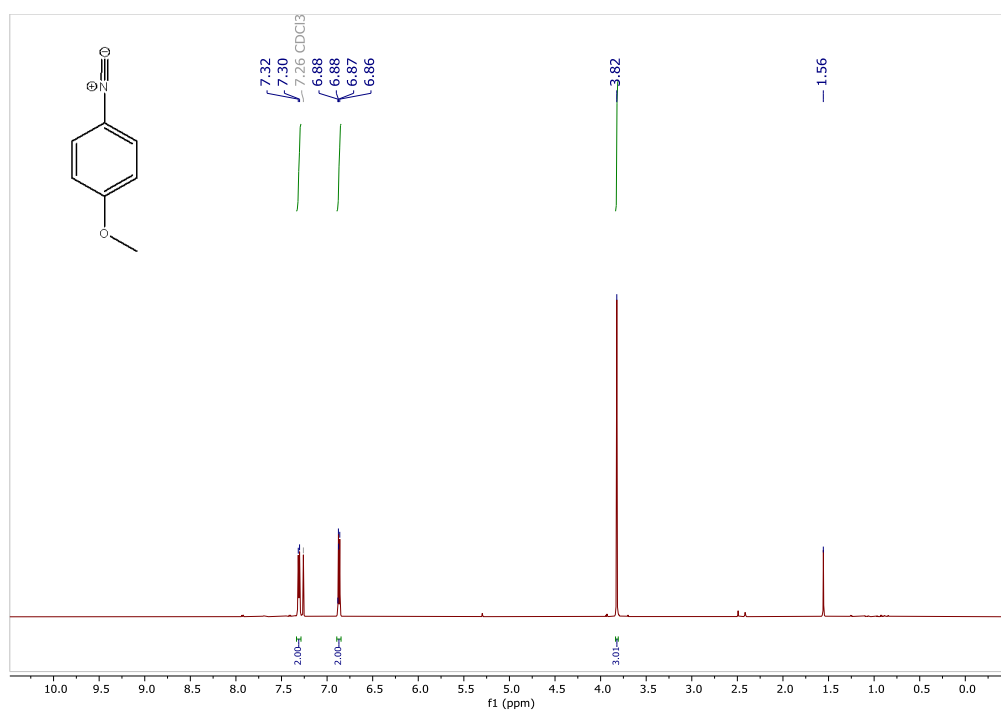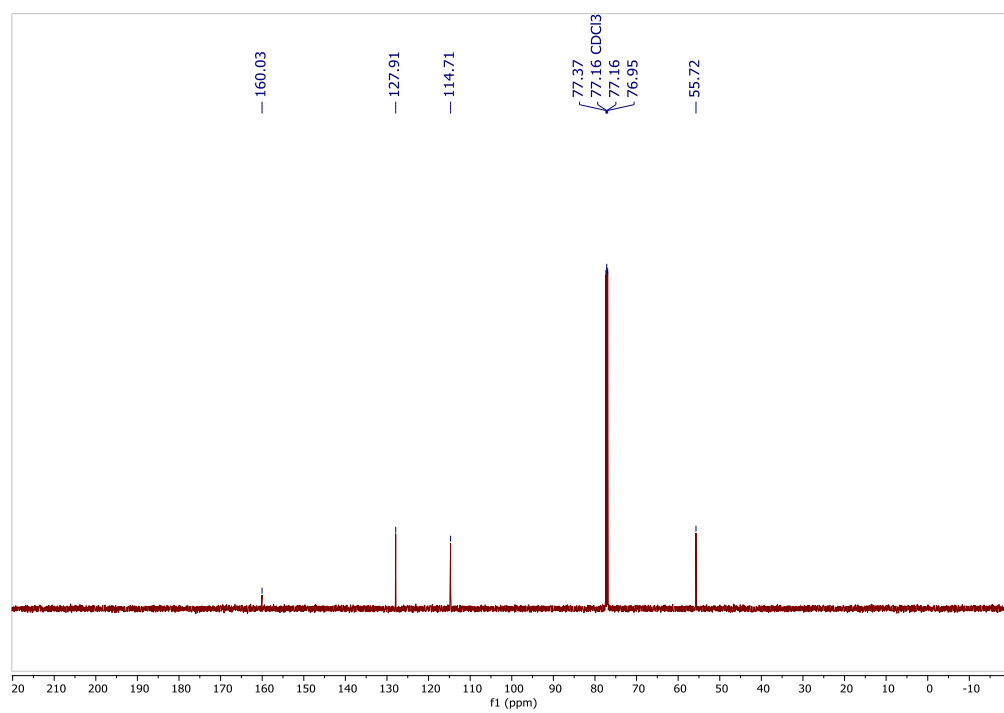

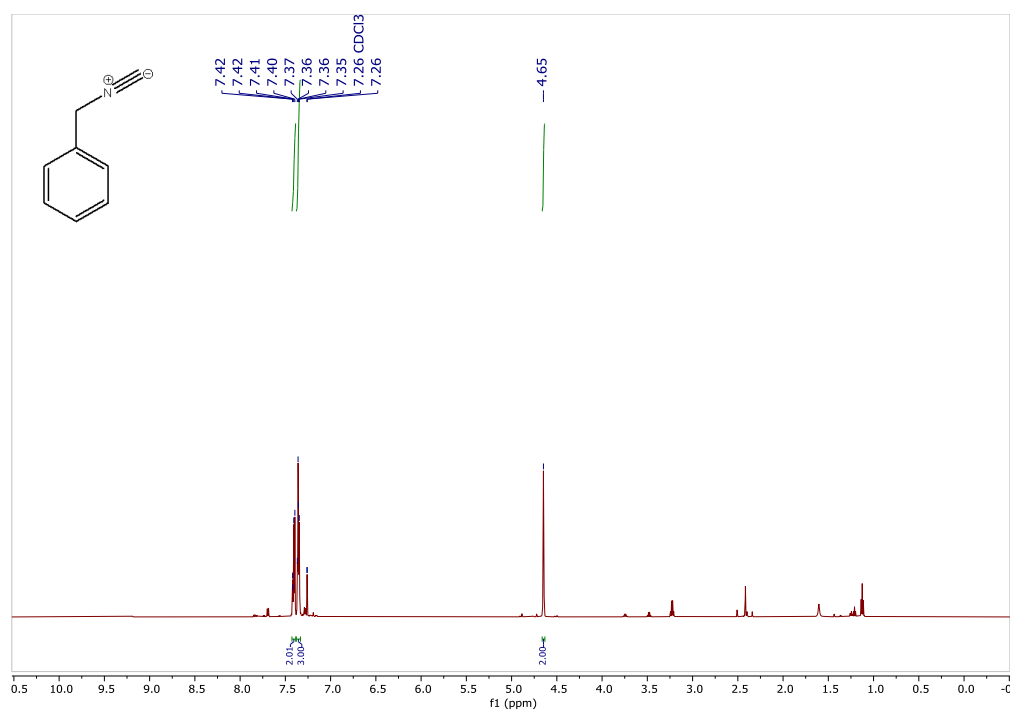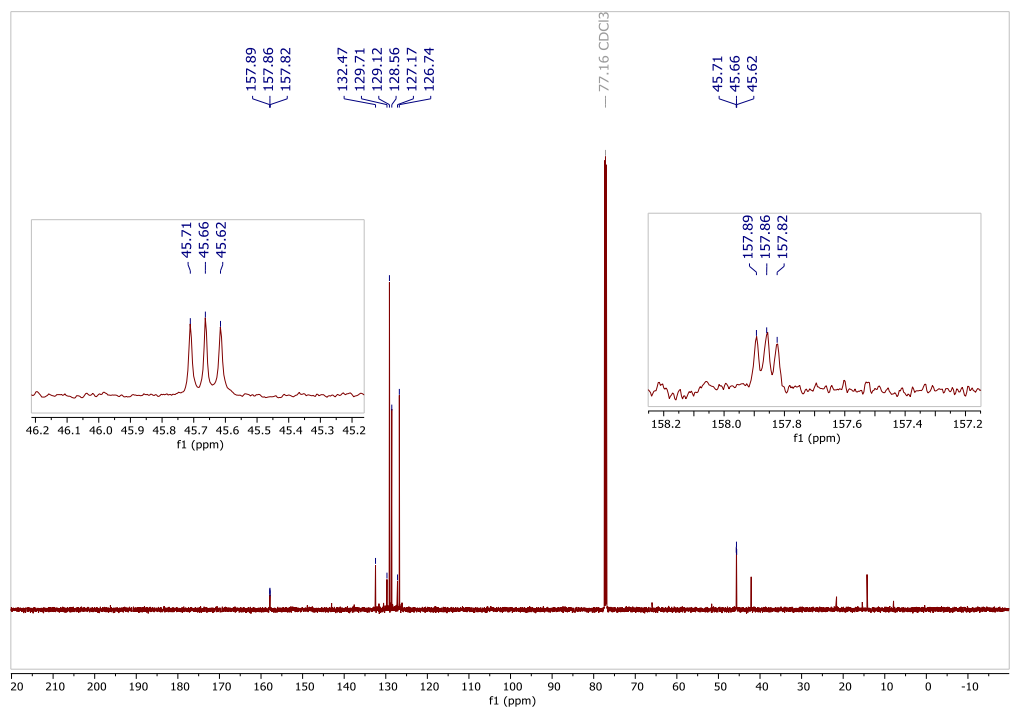



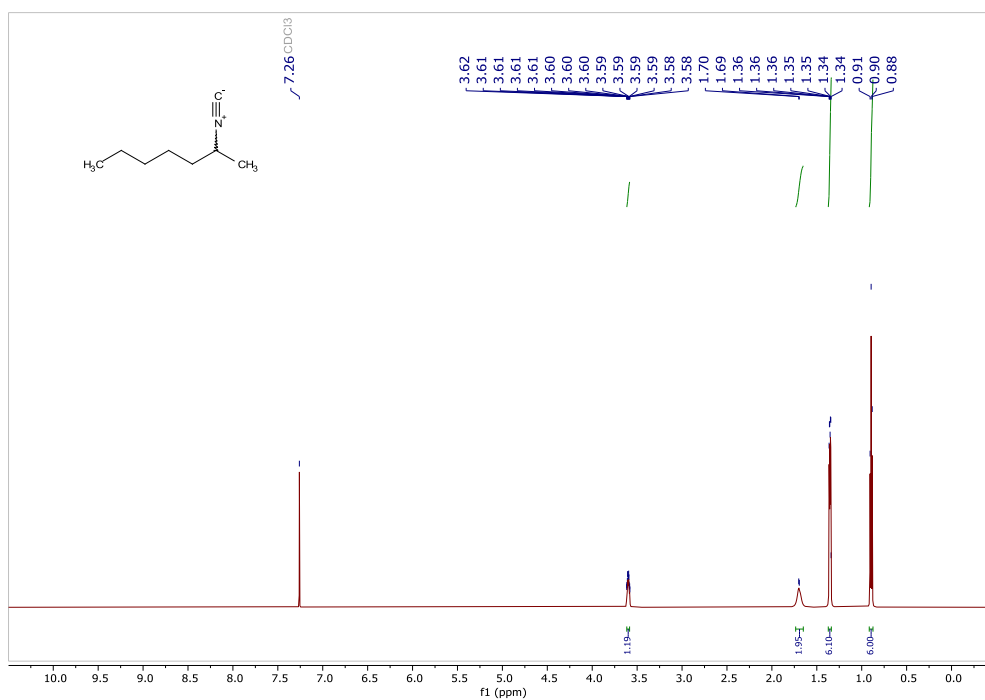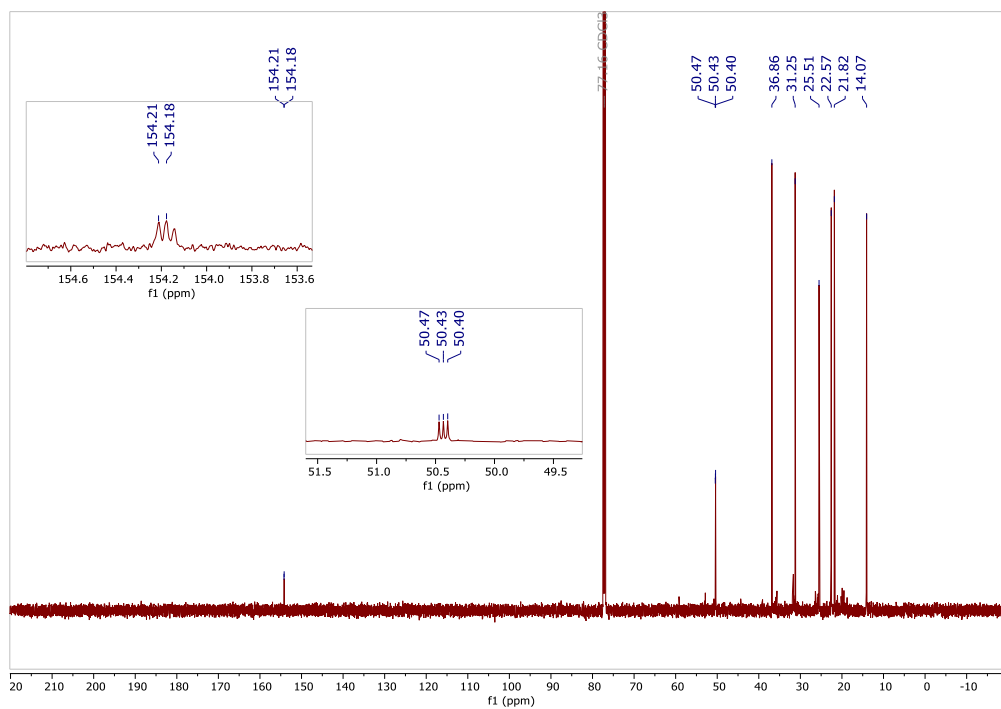

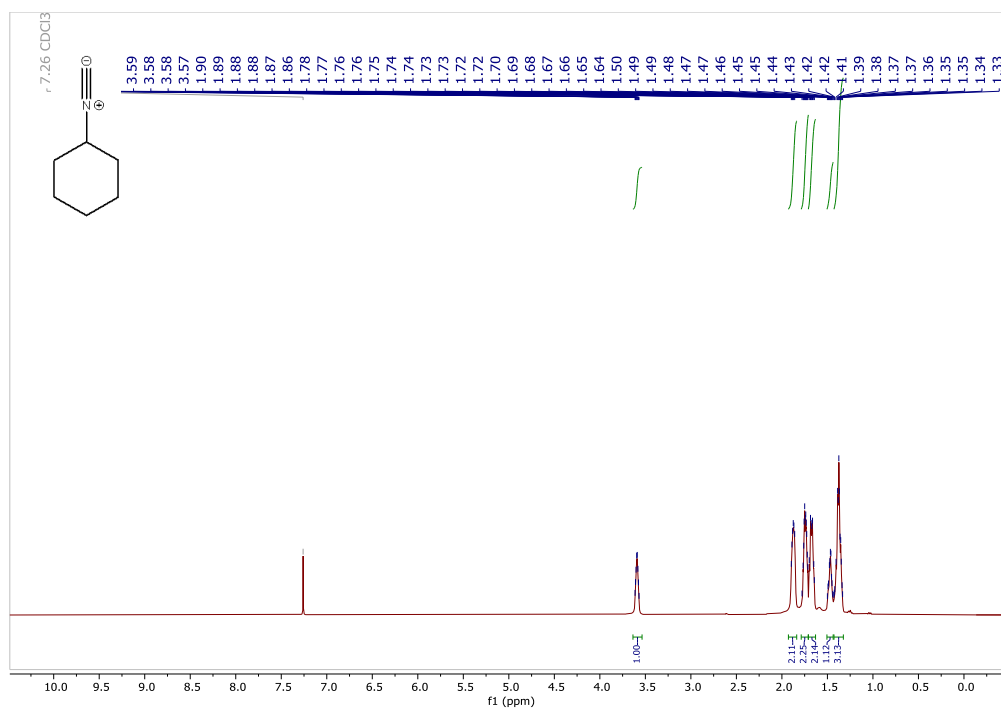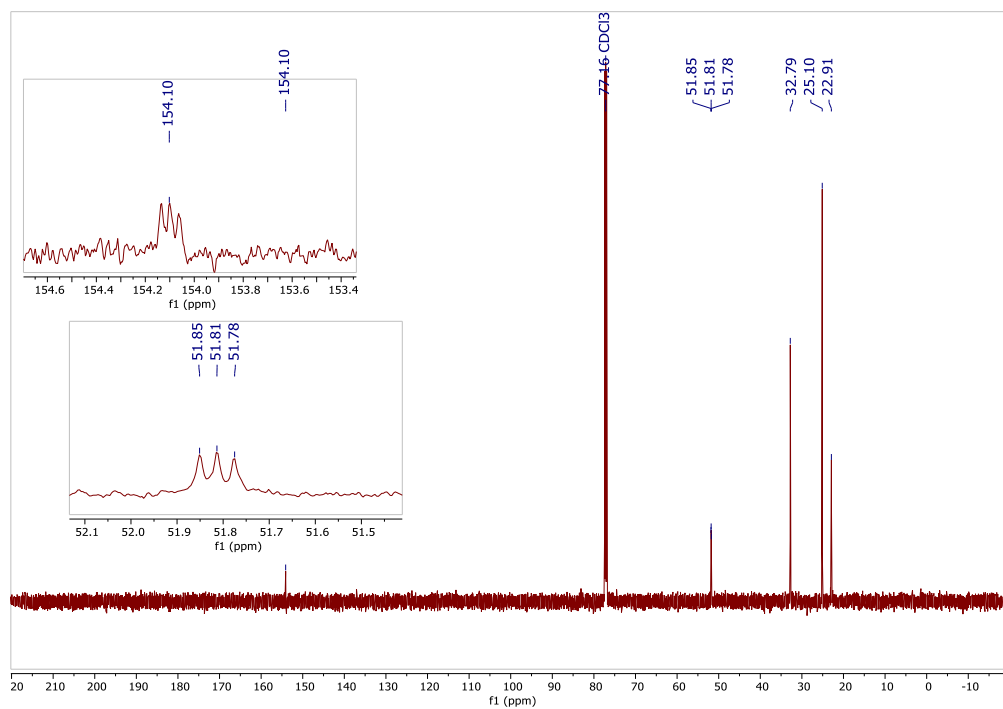

Supplement: Additional file 1 [file 1860-5397-18-73-S1.pdf]
